# Supplementary material
Source: Springer Nature journal article supplement (https://www.springermedizin.de/resource/supplementary/13075_2011_3538_MOESM3_ESM.pdf/9694642)

HE

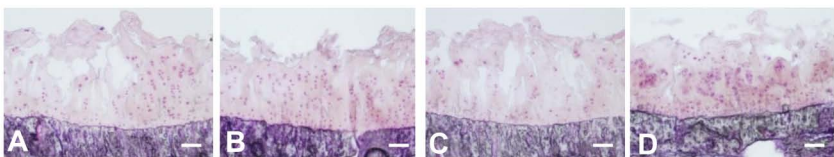

Safranin-O

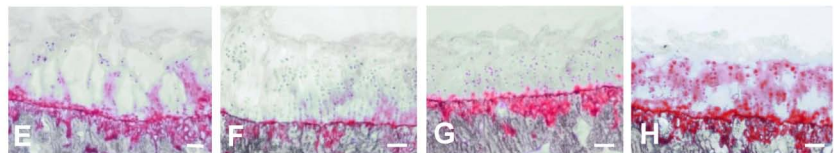

PBS

HA

PBS + MSCs

HA + MSCs

I

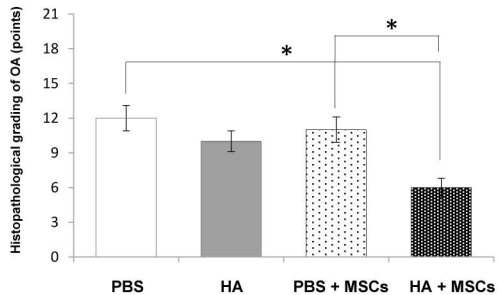

Supplement: MOESM3 [file 9694642]
